# Supplementary material for: Polymorphism and physical properties of pure and lead-doped monoclinic Sm2MoO6 oxymolybdates
Source: Royal Society of Chemistry journal article supplement (doi:10.1039/d4ce00437j), 2024-01-01
Supplement: d4ce00437j1.pdf [file d4ce00437j1.pdf]

## Supplementary information

### **Polymorphism and physical properties of pure and lead-doped monoclinic Sm<sub>2</sub>MoO<sub>6</sub> oxymolybdates**

Ekaterina I. Orlova<sup>a,b\*</sup>, Leon K. Kostanyan<sup>c</sup>, Maria P. Trukhacheva<sup>a,b</sup>, Timofei A. Sorokin<sup>a</sup>, Egor D. Baldin<sup>d</sup>,  Elena P. Kharitonova<sup>a,b</sup>, Nikolay V. Lyskov<sup>e,f</sup>, Vasiliy O. Yapaskurt<sup>g</sup>, Olga A. Alekseeva<sup>a</sup>, Valentina I. Voronkova<sup>b</sup>

<sup>a</sup> *Shubnikov Institute of Crystallography, Kurchatov Complex of Crystallography and Photonics, National Research Centre "Kurchatov Institute," Leninskii Prospekt 59, Moscow, 119333, Russian Federation.*

<sup>b</sup> *Lomonosov Moscow State University, Faculty of Physics, GSP-1, Leninskie Gory, Moscow, 119991, Russian Federation*

<sup>c</sup> *Lomonosov Moscow State University, Department of Chemistry, GSP-1, Leninskie Gory, Moscow, 119991, Russian Federation*

<sup>d</sup> *N.N. Semenov Federal Research Center For Chemical Physics RAS, Kosygina 4, Moscow, 119991, Russian Federation*

<sup>e</sup> *Federal Research Center for Problems of Chemical Physics and Medical Chemistry of the Russian Academy of Sciences, Acad. Semenov av. 1, Chernogolovka, 142432, Russian Federation*

<sup>f</sup> *National Research University "Higher School of Economics", Miasnitskaya Str. 20, Moscow, 101000, Russian Federation*

<sup>g</sup> *Lomonosov Moscow State University, Department of Geology, GSP-1, Leninskie Gory, Moscow, 119991, Russian Federation*

Correspondence:

Ekaterina Orlova, M.V. Lomonosov

Moscow State University, Leninskie gory

1/2, 119991, Moscow, Russia.

E-mail: agapova@polly.phys.msu.ru

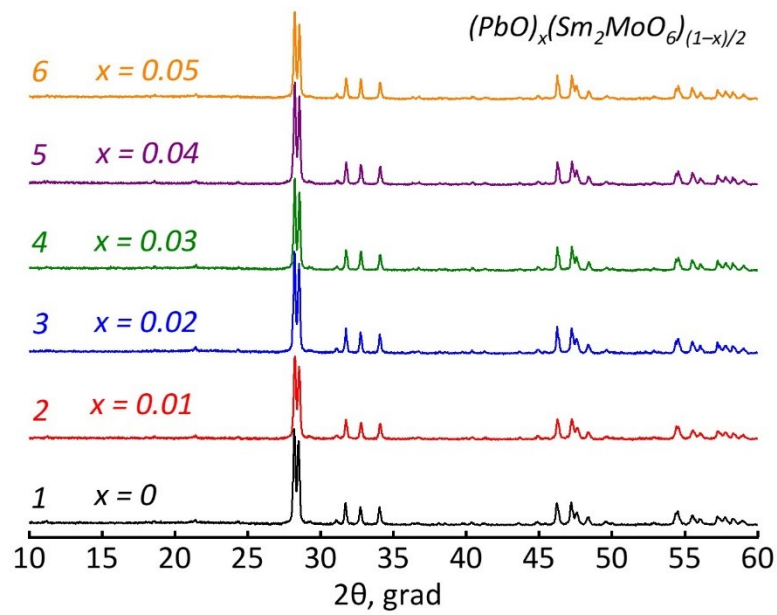

Figure S1. Powder XRD patterns of  $(\text{PbO})_x(\text{Sm}_2\text{MoO}_6)_{(1-x)/2}$  ( $x = 0; 0.01; 0.02; 0.03; 0.04; 0.05$ ) polycrystalline samples.

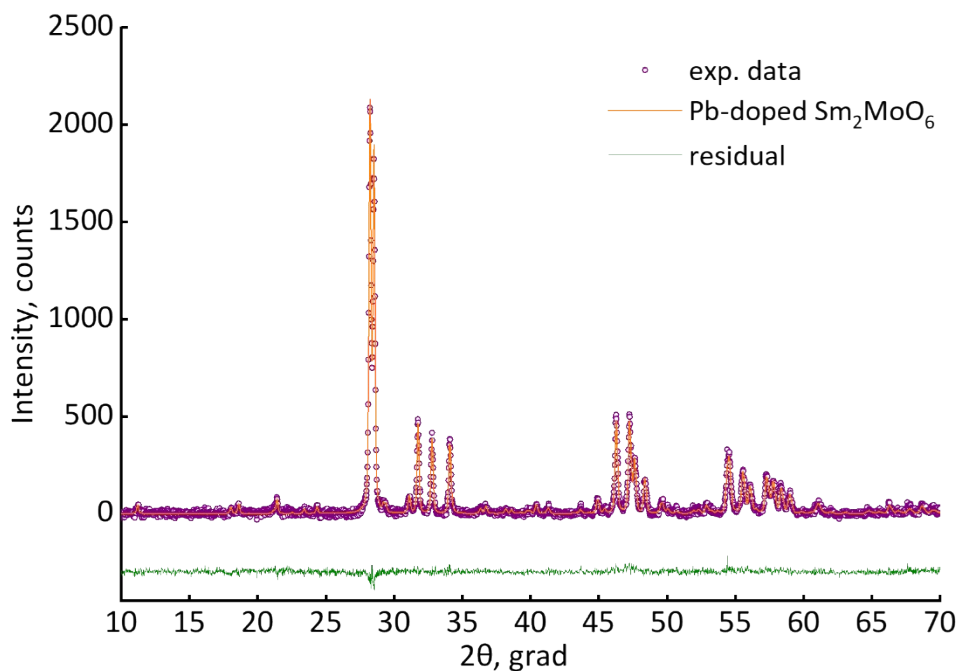

Figure S2. Rietveld refinement of XRD data results for the  $(\text{PbO})_x(\text{Sm}_2\text{MoO}_6)_{(1-x)/2}$  ( $x = 0.01$ ) sample.

Table S1. Unit cell parameters for  $(\text{PbO})_x(\text{Sm}_2\text{MoO}_6)_{(1-x)/2}$  ( $x = 0, 0.01, 0.02, 0.03, 0.04, 0.05, 0.10, 0.125, 0.15, 0.20, 0.30$ ) polycrystalline samples.

| Nominal composition<br>$(\text{PbO})_x(\text{Sm}_2\text{MoO}_6)_{(1-x)/2}, x$ | a, Å       | b, Å       | c, Å     | v, Å <sup>3</sup> | $\beta$ , ° | R <sub>wp</sub> , % |
|-------------------------------------------------------------------------------|------------|------------|----------|-------------------|-------------|---------------------|
| 0                                                                             | 16.635(2)  | 11.278(14) | 5.467(7) | 974.27            | 108.34(2)   | 6.64                |
| 0.01                                                                          | 16.635(17) | 11.277(11) | 5.467(6) | 971.64            | 108.34(2)   | 6.78                |
| 0.02                                                                          | 16.631(8)  | 11.276(6)  | 5.469(3) | 972.36            | 108.30(2)   | 7.18                |
| 0.03                                                                          | 16.634(17) | 11.279(11) | 5.471(5) | 970.87            | 108.27(19)  | 9.88                |
| 0.04                                                                          | 16.635(17) | 11.279(11) | 5.470(6) | 970.95            | 108.29(18)  | 9.26                |
| 0.05                                                                          | 16.633(16) | 11.278(11) | 5.471(5) | 971.37            | 108.27(2)   | 9.97                |
| 0.10                                                                          | 16.631(17) | 11.273(11) | 5.470(6) | 970.52            | 108.280(2)  | 7.18                |
| 0.125                                                                         | 16.627(13) | 11.269(9)  | 5.469(4) | 973.30            | 108.27(2)   | 6.82                |
| 0.15                                                                          | 16.636(2)  | 11.271(15) | 5.472(7) | 971.02            | 108.30(3)   | 7.13                |
